# Supplementary material
Source: ML conference proceedings conference paper supplement (https://proceedings.mlr.press/v108/xue20a.html)
Supplement: Supplementary file 1 [file xue20a-supp.pdf]

# Supplementary Materials for “Auditing ML Models for Individual Bias and Unfairness”

## A Proofs

### A.1 Proof of Proposition in Section 2

*Proof of Proposition 2.2.* For the simplicity of notations, we drop the subscript of the loss function picked by the auditor, that is, we denote  $\ell_h$  by  $\ell$ . Furthermore, let

$$\ell_\lambda^c(z) = \ell_\lambda^c(x, y) \triangleq \sup_{x_2 \in \mathcal{X}} \{\ell(x_2, y) - \lambda c((x, y), (x_2, y))\}.$$

By the duality result of [Blanchet and Murthy \(2019\)](#), for any  $\varepsilon > 0$ , we have

$$\sup_{P:W(P, P_n) \leq \varepsilon} \mathbb{E}_{Z \sim P}[\ell(Z)] = \inf_{\lambda \geq 0} \{\lambda \varepsilon + \mathbb{E}_{Z \sim P_n}[\ell_\lambda^c(Z)]\}$$

and

$$\sup_{P:W_*(P, P_n) \leq \varepsilon} \mathbb{E}_{Z \sim P}[\ell(Z)] = \inf_{\lambda \geq 0} \{\lambda \varepsilon + \mathbb{E}_{Z \sim P_n}[\ell_{\lambda_*}^{c_*}(Z)]\}.$$

Let  $\lambda_* \in \arg \min_{\lambda \geq 0} \{\lambda \varepsilon + \mathbb{E}_{Z \sim P_n}[\ell_\lambda^{c_*}(Z)]\}$ . Then we have

$$\begin{aligned} & \sup_{P:W(P, P_n) \leq \varepsilon} \mathbb{E}_{Z \sim P}[\ell(Z)] - \sup_{P:W_*(P, P_n) \leq \varepsilon} \mathbb{E}_{Z \sim P}[\ell(Z)] \\ &= \inf_{\lambda \geq 0} \{\lambda \varepsilon + \mathbb{E}_{Z \sim P_n}[\ell_\lambda^c(Z)]\} - \lambda_* \varepsilon - \mathbb{E}_{Z \sim P_n}[\ell_{\lambda_*}^{c_*}(Z)] \\ &\leq \lambda_* \varepsilon + \mathbb{E}_{Z \sim P_n}[\ell_{\lambda_*}^c(Z)] - \lambda_* \varepsilon - \mathbb{E}_{Z \sim P_n}[\ell_{\lambda_*}^{c_*}(Z)] \\ &= \mathbb{E}_{Z \sim P_n}[\ell_{\lambda_*}^c(Z) - \ell_{\lambda_*}^{c_*}(Z)]. \end{aligned}$$

By Assumption A3, we have

$$\begin{aligned} \ell_{\lambda_*}^c(z) - \ell_{\lambda_*}^{c_*}(z) &= \sup_{x_2 \in \mathcal{X}} \{\ell(x_2, y) - \lambda_* c((x, y), (x_2, y))\} - \sup_{x_2 \in \mathcal{X}} \{\ell(x_2, y) - \lambda_* c_*((x, y), (x_2, y))\} \\ &\leq \lambda_* \sup_{x_2 \in \mathcal{X}} |c((x, y), (x_2, y)) - c_*((x, y), (x_2, y))| \\ &\leq \lambda_* \eta D^2. \end{aligned}$$

Thus, we conclude that

$$\sup_{P:W(P, P_n) \leq \varepsilon} \mathbb{E}_{Z \sim P}[\ell(Z)] - \sup_{P:W_*(P, P_n) \leq \varepsilon} \mathbb{E}_{Z \sim P}[\ell(Z)] \leq \lambda_* \eta D^2.$$

Similarly, we have

$$\sup_{P:W_*(P, P_n) \leq \varepsilon} \mathbb{E}_{Z \sim P}[\ell(Z)] - \sup_{P:W(P, P_n) \leq \varepsilon} \mathbb{E}_{Z \sim P}[\ell(Z)] \leq \lambda_\dagger \eta D^2,$$

where  $\lambda_\dagger \in \arg \min_{\lambda \geq 0} \{\lambda \varepsilon + \mathbb{E}_{Z \sim P_n}[\ell_\lambda^c(Z)]\}$ .

Now, it suffices to show that  $\lambda_* \leq \frac{L}{\sqrt{\varepsilon}}$  (and similarly  $\lambda_\dagger \leq \frac{L}{\sqrt{\varepsilon}}$ ). By the optimality of  $\lambda_*$ ,

$$\begin{aligned} \lambda_* \varepsilon &\leq \lambda_* \varepsilon + \mathbb{E}_{Z \sim P_n}[\sup_{x_2 \in \mathcal{X}} \{\ell(x_2, Y) - \lambda_* d_{x_*}^2(X, x_2)\} - \ell(X, Y)] \\ &= \lambda_* \varepsilon + \mathbb{E}_{Z \sim P_n}[\ell_{\lambda_*}^{c_*}(Z) - \ell(Z)] \\ &\leq \lambda \varepsilon + \mathbb{E}_{Z \sim P_n}[\ell_\lambda^{c_*}(Z) - \ell(Z)] \\ &= \lambda \varepsilon + \mathbb{E}_{Z \sim P_n}[\sup_{x_2 \in \mathcal{X}} \{\ell(x_2, Y) - \ell(X, Y) - \lambda d_{x_*}^2(X, x_2)\}] \end{aligned}$$

for any  $\lambda \geq 0$ . By Assumption A2, the right-hand side is at most

$$\begin{aligned} \lambda_* \varepsilon &\leq \lambda \varepsilon + \mathbb{E}_{Z \sim P_n} \left[ \sup_{x_2 \in \mathcal{X}} \{Ld_{x_*}(X, x_2) - \lambda d_{x_*}^2(X, x_2)\} \right] \\ &\leq \lambda \varepsilon + \sup_{t \geq 0} \{Lt - \lambda t^2\}. \end{aligned}$$

We minimize the right-hand side with respect to  $t$  (set  $t = \frac{L}{2\lambda}$ ) and  $\lambda$  (set  $\lambda = \frac{L}{2\sqrt{\varepsilon}}$ ) to obtain  $\lambda_* \varepsilon \leq L\sqrt{\varepsilon}$ , or equivalently  $\lambda_* \leq \frac{L}{\sqrt{\varepsilon}}$ .  $\square$

## A.2 Proofs of Theorems in Section 3

*Proof of Theorem 3.1.* We are working with Euclidean space  $\mathbb{D} = \mathbb{R}^K$  and  $\mathbb{E} = \mathbb{R}$ .

By Theorem 3.4,  $\psi : \mathbb{R}^K \rightarrow \mathbb{R}$  is Hadamard directionally differentiable at  $f_*$  (tangentially to  $\mathbb{R}^K$ ).

Since  $f_n$  is the empirical version of  $f_*$ , by central limit theorem, we have

$$\sqrt{n}(f_n - f_*) \xrightarrow{d} \mathcal{N}(0, \Sigma(f_*)) \stackrel{d}{\sim} Z,$$

which is tight and supported in  $\mathbb{R}^K$ .

Via delta method (Theorem 3.3) with  $\psi(\cdot)$  and the derivative formula given by Theorem 3.4, we conclude

$$\sqrt{n}\{\psi(f_n) - \psi(f_*)\} \xrightarrow{d} \psi'_{f_*}(Z) = \inf\{(\lambda + l)^\top Z : (\nu, \mu, \lambda) \in \Lambda\}.$$

Hence we complete the proof of Theorem 3.1.  $\square$

The next theorem adapted from from [Bonnans and Shapiro \(2000\)](#) will turn out to be useful.

**Theorem A.1** (Proposition 4.27 in [Bonnans and Shapiro \(2000\)](#)).  $\mathbb{A}, \mathbb{B}$  and  $\mathbb{V}$  are Banach spaces.  $f : \mathbb{A} \rightarrow \mathbb{R}$  is continuously differentiable.  $G + \bullet : \mathbb{A} \times \mathbb{V} \rightarrow \mathbb{B}$  is continuously differentiable.  $\mathbb{K}$  is a closed convex subset of  $\mathbb{B}$ . Consider a class of problems

$$\begin{aligned} (\mathcal{P}_v) : \quad & \min_{x \in \mathbb{A}} f(x) \\ & \text{subject to } G(x) + v \in \mathbb{K} \end{aligned}$$

parameterized by  $v \in \mathbb{V}$ . Let  $\varphi(v)$  be the optimal value of the problem  $\mathcal{P}_v$ . Suppose that

1. for  $v = 0$ , the problem  $\mathcal{P}_0$  is convex;
2.  $\varphi(0)$  is finite;
3.  $0 \in \text{int}\{G(\mathbb{A}) - \mathbb{K}\}$ .

Then the optimal value function  $\varphi(v)$  is Hadamard directionally differentiable at  $v = 0$ . Furthermore,

$$\lim_{h' \rightarrow h, t \rightarrow 0^+} \frac{\varphi(th') - \varphi(0)}{t} = \sup\{\lambda^\top h : \lambda \in \Gamma\}$$

for any  $h \in \mathbb{V}$ , where  $\Gamma$  is the set of optimal solutions of the dual problem of  $\mathcal{P}_0$ .

*Proof of Theorem 3.4.* We first prove the theorem without constraint  $\langle D, \Pi \rangle = 0$ . In order to employ Theorem A.1, the result of canonical perturbation, we introduce a parameter  $t \in \mathbb{R}$ , and the optimization problem  $\psi(f_*)$  can be equivalently rewritten as

$$\begin{aligned} (\text{P1}) : \quad & \max_{t \in \mathbb{R}, \Pi \in \mathbb{R}_+^{K \times K}} l^\top (\Pi^\top \mathbf{1}_K - f_*) + t \\ & \text{subject to } \langle C, \Pi \rangle \leq \varepsilon & : \nu \\ & \Pi \mathbf{1}_K = f_* & : \lambda \\ & t = 0 & : \eta \end{aligned}$$

where  $\nu, \lambda, \eta$  are Lagrange multipliers.

The canonical perturbation of problem (P1) is then given by

$$\begin{aligned}
 (\mathcal{P}_{u,v,w}) : \quad & \max_{t \in \mathbb{R}, \Pi \in \mathbb{R}_+^{K \times K}} \quad l^\top (\Pi^\top \mathbf{1}_K - f_\star) + t \\
 & \text{subject to} \quad \langle C, \Pi \rangle + u \leq \varepsilon \\
 & \quad \quad \quad \Pi \mathbf{1}_K + v = f_\star \\
 & \quad \quad \quad t + w = 0,
 \end{aligned}$$

which outputs its optimal value  $\varphi(u, v, w)$ . Thus  $\varphi$  is a function from  $\mathbb{R}^{K+2}$  to  $\mathbb{R}$ .

Let  $\mathbb{A} = \mathbb{R}_+^{K \times K} \times \mathbb{R}$ ,  $\mathbb{B} = \mathbb{V} = \mathbb{R}^{K+2}$ , and  $\mathbb{K} = \{(x, f_\star^\top, 0)^\top : x \leq \varepsilon\} \subset \mathbb{R}^{K+2}$ . Consider function  $f : \mathbb{A} \rightarrow \mathbb{R}$  such that  $(\Pi, t) \mapsto -\{l^\top (\Pi^\top \mathbf{1}_K - f_\star) + t\}$ , and function  $G : \mathbb{A} \rightarrow \mathbb{B}$  such that  $(\Pi, t) \mapsto (\langle C, \Pi \rangle, (\Pi \mathbf{1}_K)^\top, t)^\top$ .

Then, the class of maximization problems  $(\mathcal{P}_{u,v,w})$  is equivalent to the following class of minimization problems

$$\begin{aligned}
 (\mathcal{Q}_{u,v,w}) : \quad & \min_{(\Pi, t) \in \mathbb{A}} \quad f(\Pi, t) \\
 & \text{subject to} \quad G(\Pi, t) + (u, v^\top, w)^\top \in \mathbb{K}.
 \end{aligned}$$

Denote the optimal value function of  $\mathcal{Q}_{u,v,w}$  by  $\phi(u, v, w)$ .

(i) To check item 1 in Theorem A.1, we note that  $\mathcal{Q}_{0, \mathbf{0}_K, 0}$  is a problem of linear programming, and thus a convex optimization problem.

(ii) Item 2 in Theorem A.1 is guaranteed by

$$\varepsilon \geq 0 = \min\{\langle C, \Pi \rangle : \Pi \in \mathbb{R}_+^{K \times K}, \Pi \mathbf{1}_K = f_\star\},$$

which implies that  $\mathcal{Q}_{0, \mathbf{0}_K, 0}$  has a solution, and thus  $\phi(0, \mathbf{0}_K, 0)$  is finite.

(iii)  $f_\star \in \mathbb{R}_+^K$  ensures that item 3 in Theorem A.1 holds.

Now applying Theorem A.1 to  $(\mathcal{Q}_{u,v,w})$ , we conclude that  $\phi$  is Hadamard directionally differentiable at the origin. Note that  $\varphi = -\phi$ , we can further conclude that  $\varphi$  is also Hadamard directionally differentiable at the origin, and

$$\lim_{\substack{\xi' \rightarrow \xi \\ t \rightarrow 0^+}} \frac{\varphi(0, t\xi') - \varphi(0, \mathbf{0}_{K+1})}{t} = - \lim_{\substack{\xi' \rightarrow \xi \\ t \rightarrow 0^+}} \frac{\phi(0, t\xi') - \phi(0, \mathbf{0}_{K+1})}{t} = - \sup\{\langle (\lambda^\top, w)^\top, \xi \rangle : (\nu, \lambda, w) \in \Gamma\},$$

where  $\Gamma$  is the set of optimal solutions of the dual problem of (P1).

Furthermore, one can check that  $\Gamma = \Lambda \times \{-1\}$ , where  $\Lambda$  is the set of optimal solutions of the dual problem of  $\psi(f_\star)$ .

Specifically, the dual problem of  $\psi(f_\star)$  is given by

$$\begin{aligned}
 & \min_{\nu \geq 0, \lambda_1, \dots, \lambda_K} \quad -\varepsilon\nu - \sum_{k=1}^K f_\star^{(k)} \lambda_k \\
 & \text{subject to} \quad c_{ij}\nu + \lambda_i \leq -l_j, \quad \text{for } 1 \leq i, j \leq K.
 \end{aligned}$$

Thus, we have

$$\Lambda = \arg \max_{\nu, \geq 0, \lambda \in \mathbb{R}^K} \{\varepsilon\nu + f_\star^\top \lambda : c_{ij}\nu + \lambda_i \leq -l_j, 1 \leq i, j \leq K\}$$

Note that  $\psi(f) = \varphi(0, f_\star - f, l^\top(f - f_\star))$ , we conclude that  $\psi(f)$  is Hadamard directionally differentiable at  $f_\star$ , and the derivative formula is given by

$$\begin{aligned}
 \psi'_{f_\star}(h) &= \lim_{\substack{h' \rightarrow h \\ t \rightarrow 0^+}} \frac{\psi(f_\star + th') - \psi(f_\star)}{t} \\
 &= \lim_{\substack{h' \rightarrow h \\ t \rightarrow 0^+}} \frac{\varphi(0, -th', tl^\top h') - \varphi(0, \mathbf{0}_K, 0)}{t} \\
 &= \lim_{\substack{\xi' \rightarrow \xi \\ t \rightarrow 0^+}} \frac{\varphi(0, t\xi') - \varphi(0, \mathbf{0}_{K+1})}{t} \quad [\text{where } \xi = (-h^\top, l^\top h)^\top] \\
 &= -\sup\{\langle (\lambda^\top, w)^\top, \xi \rangle : (\nu, \lambda, w) \in \Gamma\} \\
 &= -\sup\{\langle (\lambda^\top, -1)^\top, (-h^\top, l^\top h)^\top \rangle : (\nu, \lambda) \in \Lambda\} \\
 &= -\sup\{-\langle \lambda + l, h \rangle : (\nu, \lambda) \in \Lambda\} \\
 &= \inf\{\langle \lambda + l, h \rangle : (\nu, \lambda) \in \Lambda\}.
 \end{aligned}$$

For the case with constraint  $\langle D, \Pi \rangle = 0$ , note that the dual problem of  $\psi(f_\star)$  changes slightly into

$$\begin{aligned}
 \min_{\nu, \mu \geq 0, \lambda_1, \dots, \lambda_K} \quad & -\varepsilon\nu - \sum_{k=1}^K f_\star^{(k)} \lambda_k \\
 \text{subject to} \quad & c_{ij}\nu + d_{ij}\mu + \lambda_i \leq -l_j, \quad \text{for } 1 \leq i, j \leq K,
 \end{aligned}$$

and

$$\Lambda = \arg \max_{\nu, \mu \geq 0, \lambda \in \mathbb{R}^K} \{\varepsilon\nu + f_\star^\top \lambda : c_{ij}\nu + d_{ij}\mu + \lambda_i \leq -l_j, 1 \leq i, j \leq K\}.$$

Hence we complete the proof of Theorem 3.4.  $\square$

### A.3 Proofs of Theorems in Section 4

The following lemma adapted from [Hong and Li \(2018\)](#) provides a general recipe for the consistency of our two bootstrap strategies.

**Lemma A.2** (Theorem 3.1 in [Hong and Li \(2018\)](#)). *Suppose  $\mathbb{D}$  and  $\mathbb{E}$  are Banach Spaces and  $\phi : \mathbb{D}_\phi \subseteq \mathbb{D} \mapsto \mathbb{E}$  is Hadamard directionally differentiable at  $\theta_0$  tangentially to  $\mathbb{D}_0$ . Let  $\hat{\theta}_n : \{X_i\}_{i=1}^n \mapsto \mathbb{D}_\phi$  be such that for some  $r_n \uparrow \infty, r_n \{\hat{\theta}_n - \theta_0\} \rightsquigarrow \mathbb{G}_0$  in  $\mathbb{D}$ , where  $\mathbb{G}_0$  is tight and its support is included in  $\mathbb{D}_0$ . Then*

$$r_n \left( \phi \left( \hat{\theta}_n \right) - \phi \left( \theta_0 \right) \right) \rightsquigarrow \phi'_{\theta_0} \left( \mathbb{G}_0 \right).$$

Let  $\mathbb{Z}_n^* \rightsquigarrow \mathbb{G}_0$  satisfy regularity of measurability<sup>1</sup>. Then for  $\varepsilon_n \rightarrow 0, r_n \varepsilon_n \rightarrow \infty$ ,

$$\hat{\phi}'_n(\mathbb{Z}_n^*) \stackrel{\text{def}}{=} \frac{\phi \left( \hat{\theta}_n + \varepsilon_n \mathbb{Z}_n^* \right) - \phi \left( \hat{\theta}_n \right)}{\varepsilon_n} \rightsquigarrow \phi'_{\theta_0} \left( \mathbb{G}_0 \right).$$

*Proof of Theorem 4.1.* Hereafter,  $\mathbb{G}_0$  refers to  $\mathcal{N}(f_\star, \Sigma(f_\star))$ . By central limit theorem, we have

$$\sqrt{n}\{f_n - f_\star\} \rightsquigarrow \mathbb{G}_0 \quad \text{and} \quad \sqrt{m}\{f_{n,m}^* - f_\star\} \rightsquigarrow \mathbb{G}_0.$$

Since  $m/n \rightarrow 0$ , we have

$$\sqrt{m}\{f_{n,m}^* - f_n\} = \sqrt{m}\{f_{n,m}^* - f_\star\} - \sqrt{\frac{m}{n}} \sqrt{n}\{f_n - f_\star\} \rightsquigarrow \mathbb{G}_0.$$

<sup>1</sup> $\mathbb{Z}_n^*$  is asymptotically measurable jointly in the data and the bootstrap weights;  $g(\mathbb{Z}_n^*)$  is a measurable function of the bootstrap weights outer almost surely in the data for every bounded, continuous map  $g : \mathbb{D} \rightarrow \mathbb{R}$ ;  $\mathbb{G}_0$  is Borel measurable and separable.

Let  $r_n = \sqrt{n}$ ,  $\epsilon_n = 1/\sqrt{m}$  and  $\mathbb{Z}_n^* = \sqrt{m}\{f_{n,m}^* - f_n\}$ . Then  $\epsilon_n \rightarrow 0$ ,  $r_n\epsilon_n \rightarrow \infty$ , and  $\mathbb{Z}_n^* \rightsquigarrow \mathbb{G}_0$ . Applying Lemma A.2, we conclude

$$\begin{aligned} \sqrt{m}\{\psi(f_{n,m}^*) - \psi(f_n)\} &= \frac{\psi\left(f_n + \frac{1}{\sqrt{m}}\sqrt{m}\{f_{n,m}^* - f_n\}\right) - \psi(f_n)}{1/\sqrt{m}} \\ &= \frac{\psi(f_n + \epsilon_n\mathbb{Z}_n^*) - \psi(f_n)}{\epsilon_n} \rightsquigarrow \psi'_{f_*}(\mathbb{G}_0). \end{aligned}$$

Finally, note that  $\sqrt{n}\{\psi(f_n) - \psi(f_*)\} \rightsquigarrow \psi'_{f_*}(\mathbb{G}_0)$ , we have

$$\begin{aligned} &\sup_{g \in \text{BL}_1(\mathbb{R})} \left| \mathbb{E} [g(\sqrt{m}\{\psi(f_{n,m}^*) - \psi(f_n)\}) | f_n] - \mathbb{E} [g(\sqrt{n}\{\psi(f_n) - \psi(f_*)\})] \right| \\ &\leq \sup_{g \in \text{BL}_1(\mathbb{R})} \left| \mathbb{E} [g(\sqrt{m}\{\psi(f_{n,m}^*) - \psi(f_n)\}) | f_n] - \mathbb{E} [g(\psi'_{f_*}(\mathbb{G}_0))] \right| \\ &\quad + \sup_{g \in \text{BL}_1(\mathbb{R})} \left| \mathbb{E} [g(\psi'_{f_*}(\mathbb{G}_0))] - \mathbb{E} [g(\sqrt{n}\{\psi(f_n) - \psi(f_*)\})] \right| \\ &= o_p(1) + o_p(1) = o_p(1) \end{aligned}$$

by triangle inequality. Hence we complete the proof of Theorem 4.1.  $\square$

*Proof of Theorem 4.2.* By central limit theorem, we have

$$\sqrt{n}\{f_n - f_*\} \rightsquigarrow \mathbb{G}_0 \sim \mathcal{N}(\mathbf{0}_k, \Sigma(f_*)).$$

As  $\epsilon \rightarrow 0$ ,  $n \rightarrow \infty$ , we have

$$\mathbb{T}(f_n, \epsilon) \rightarrow \mathbb{R}^K \quad \text{and} \quad z_n^* \sim \mathcal{N}(\mathbf{0}_K, \Sigma(f_n); \mathbb{T}) \rightsquigarrow \mathcal{N}(\mathbf{0}_k, \Sigma(f_*)) \sim \mathbb{G}_0.$$

Let  $r_n = \sqrt{n}$ ,  $\epsilon_n = \epsilon$ , and  $\mathbb{Z}_n^* = z_n^*$ . Then  $\epsilon_n \rightarrow 0$ ,  $r_n\epsilon_n \rightarrow \infty$ , and  $\mathbb{Z}_n^* \rightsquigarrow \mathbb{G}_0$ . Applying Lemma A.2, we conclude

$$\epsilon^{-1}\{\psi(f_n + \epsilon z_n^*) - \psi(f_n)\} = \frac{\psi(f_n + \epsilon_n\mathbb{Z}_n^*) - \psi(f_n)}{\epsilon_n} \rightsquigarrow \psi'_{f_*}(\mathbb{G}_0).$$

Similar to the previous proof, note that  $\sqrt{n}\{\psi(f_n) - \psi(f_*)\} \rightsquigarrow \psi'_{f_*}(\mathbb{G}_0)$ , we have

$$\begin{aligned} &\sup_{g \in \text{BL}_1(\mathbb{R})} \left| \mathbb{E} [g(\epsilon^{-1}\{\psi(f_n + \epsilon z_n^*) - \psi(f_n)\}) | f_n] - \mathbb{E} [g(\sqrt{n}\{\psi(f_n) - \psi(f_*)\})] \right| \\ &\leq \sup_{g \in \text{BL}_1(\mathbb{R})} \left| \mathbb{E} [g(\epsilon^{-1}\{\psi(f_n + \epsilon z_n^*) - \psi(f_n)\}) | f_n] - \mathbb{E} [g(\psi'_{f_*}(\mathbb{G}_0))] \right| \\ &\quad + \sup_{g \in \text{BL}_1(\mathbb{R})} \left| \mathbb{E} [g(\psi'_{f_*}(\mathbb{G}_0))] - \mathbb{E} [g(\sqrt{n}\{\psi(f_n) - \psi(f_*)\})] \right| \\ &= o_p(1) + o_p(1) = o_p(1) \end{aligned}$$

by triangle inequality. Hence we complete the proof of Theorem 4.2.  $\square$

*Proof of Theorem 4.3.* By standard results in Politis et al. (1999), under bootstrap consistency, we have

$$\liminf_{n \rightarrow \infty} \mathbb{P} \left( \psi(f_*) \in \left[ \psi(f_n) - \frac{c_{1-\alpha/2}^*}{\sqrt{n}}, \psi(f_n) - \frac{c_{\alpha/2}^*}{\sqrt{n}} \right] \right) = 1 - \alpha$$

if the limiting distribution is continuous at the boundary of quantiles;

$$\liminf_{n \rightarrow \infty} \mathbb{P} \left( \psi(f_*) \in \left[ \psi(f_n) - \frac{c_{1-\alpha/2}^*}{\sqrt{n}}, \psi(f_n) - \frac{c_{\alpha/2}^*}{\sqrt{n}} \right] \right) > 1 - \alpha$$

if the limiting distribution is discontinuous at the boundary of quantiles. □

*Proof of Theorem 4.5.* For any  $f_\star \in \Delta_K$  such that  $\psi(f_\star) \leq \delta$ ,

$$\begin{aligned}
 & \mathbb{P}(\sqrt{n}\psi(f_n) > \sqrt{n}\delta + c_{1-\alpha}) \\
 &= 1 - \mathbb{P}(\sqrt{n}\psi(f_n) \leq \sqrt{n}\delta + c_{1-\alpha}) \\
 &= 1 - \mathbb{P}(\sqrt{n}\{\psi(f_n) - \psi(f_\star)\} \leq c_{1-\alpha} + \sqrt{n}(\delta - \psi(f_\star))) \\
 &\leq 1 - \mathbb{P}(\sqrt{n}\{\psi(f_n) - \psi(f_\star)\} \leq c_{1-\alpha}) \\
 &\leq 1 - (1 - \alpha) \\
 &= \alpha,
 \end{aligned}$$

where  $c_{1-\alpha}$  is the  $(1 - \alpha)$ -th quantile of  $\sqrt{n}\{\psi(f_n) - \psi(f_\star)\}$ . With Bootstrap consistency,

$$\begin{aligned}
 & \limsup_{n \rightarrow \infty} \sup_{f_\star \in \Delta_K: \psi(f_\star) \leq \delta} \mathbb{P}_{f_\star}(\sqrt{n}\psi(f_n) > \sqrt{n}\delta + c_{1-\alpha}^*) \\
 &\leq \limsup_{n \rightarrow \infty} \sup_{f_\star \in \Delta_K: \psi(f_\star) \leq \delta} \mathbb{P}_{f_\star}(\sqrt{n}\psi(f_n) > \sqrt{n}\delta + c_{1-\alpha}) = \alpha.
 \end{aligned}$$

For any  $f_\star \in \Delta_K$  such that  $\psi(f_\star) > \delta$ ,

$$\mathbb{P}(\sqrt{n}\psi(f_n) > \sqrt{n}\delta + c_{1-\alpha}^*) \rightarrow 1.$$

□

## B Bootstrap methods

---

### Algorithm 1 $m$ -out-of- $n$ bootstrap

---

- 1: **require:**  $m$  (rule of thumb:  $2\sqrt{n}$ ),  $B \in \mathbb{N}$
  - 2: set  $\mathcal{S} = \emptyset$
  - 3: **for**  $i = 1, 2, \dots, B$  **do:**
  - 4: draw  $Y^* \sim \text{Multinomial}(m; f_n)$
  - 5: append  $\sqrt{m}\{\psi(Y^*/m) - \psi(f_n)\}$  to  $\mathcal{S}$
  - 6: **end for**
  - 7: **output:**  $\mathcal{S}$
- 

---

### Algorithm 2 numerical derivative method

---

- 1: **require:**  $\epsilon$  (rule of thumb:  $n^{-1/4}$ ),  $B \in \mathbb{N}$
  - 2: set  $\mathcal{S} = \emptyset$ ,  $i = 1$
  - 3: **while**  $i \leq B$  **do:**
  - 4: draw  $Z^* \sim \mathcal{N}(\mathbf{0}_K, \Sigma(f_n))$
  - 5: **if**  $f_n + \epsilon Z^* \in \mathbb{R}_+^K$ :
  - 6: append  $\epsilon^{-1}\{\psi(f_n + \epsilon Z^*) - \psi(f_n)\}$  to  $\mathcal{S}$
  - 7:  $i \leftarrow i + 1$
  - 8: **else:**
  - 9: **continue**
  - 10: **output:**  $\mathcal{S}$
-
